# Supplementary material for: Electrodeposition synthesis, controllable growth, and enhanced photoluminescence of activator-doped layered gadolinium hydroxide films
Source: Royal Society of Chemistry journal article supplement (doi:10.1039/d4ce00664j), 2024-01-01
Supplement: d4ce00664j1.pdf [file d4ce00664j1.pdf]

## Supporting Information

### **Electrodeposition synthesis, controllable growth, and enhanced photoluminescence of activator doped layered gadolinium hydroxide films**

**Junjie Huang<sup>1,3#</sup>, Yongping Guo<sup>1#</sup> Sen Qin<sup>1</sup> and Xiaoli Wu<sup>1,2,3\*</sup>**

1.College of Materials Science and Engineering, Guilin University of Technology, Guilin 541004, P. R. China;

2.Guangxi Key Laboratory of Optical and Electronic Materials and Devices, Guilin University of Technology, Guilin 541004, China;

3.Collaborative Innovation Center for Exploration of Hidden Nonferrous Metal Deposits and Development of New Materials; Guilin University of Technology, Guilin 541004, China

Corresponding author

E-mail address: [wuxiaoli@glut.edu.cn](mailto:wuxiaoli@glut.edu.cn)

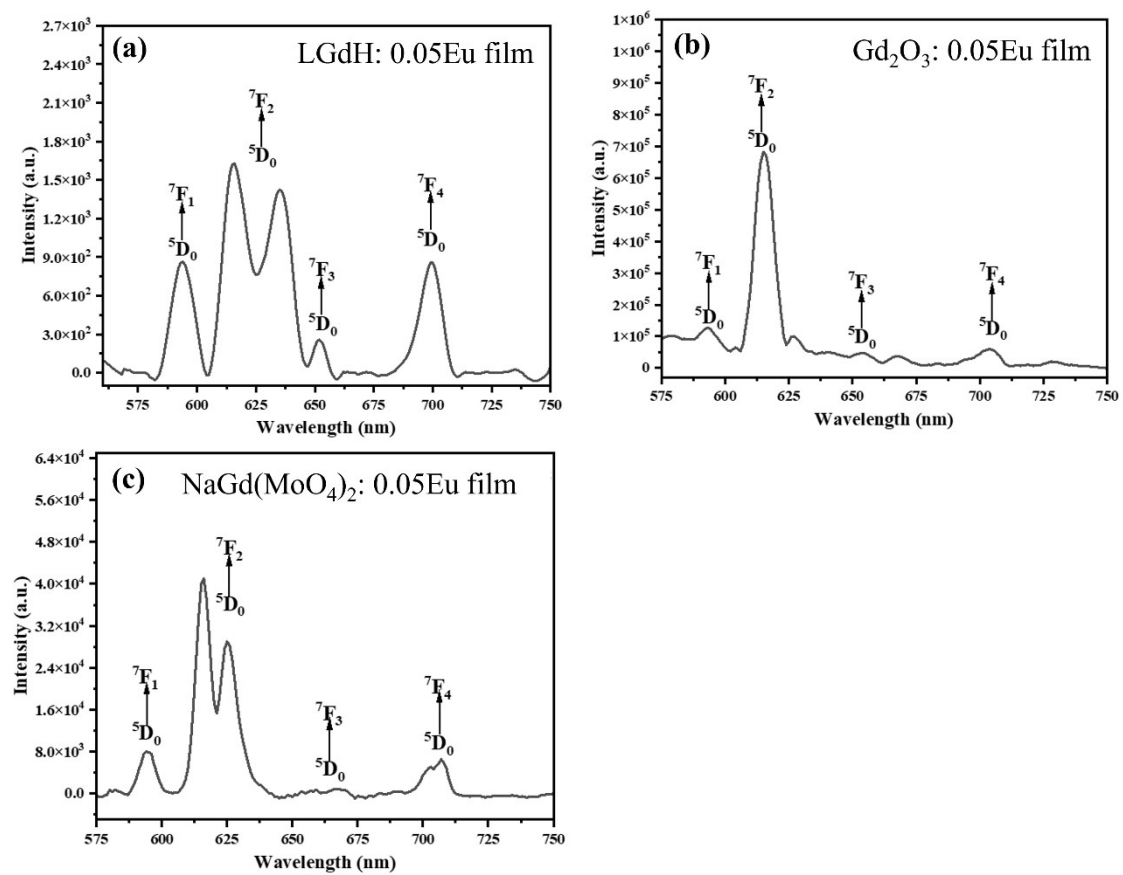

Figure S1 The emission spectra of LGdH:0.05Eu film (a),  $Gd_2O_3$ :0.05Eu film (b) and  $NaGd(MoO_4)_2$ :0.05Eu film (c) under the UV excitation at 394 nm.
